# Supplementary material for: Thermal perturbation nucleation and growth of silver molybdate nanoclusters by a dynamic template route
Source: Royal Society of Chemistry journal article supplement (doi:10.1039/c5ce00039d), 2015-01-01
Supplement: c5ce00039d1.pdf [file c5ce00039d1.pdf]

Supporting File

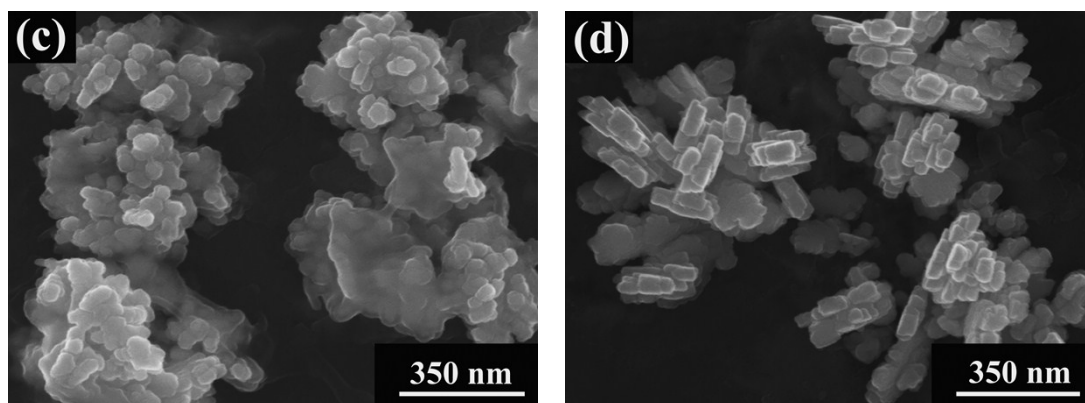

Figure 1. The SEM images of  $\text{Ag}_2\text{MoO}_4$  nanocrystal clusters under different temperature: (a)

30 °C; (b) 40 °C

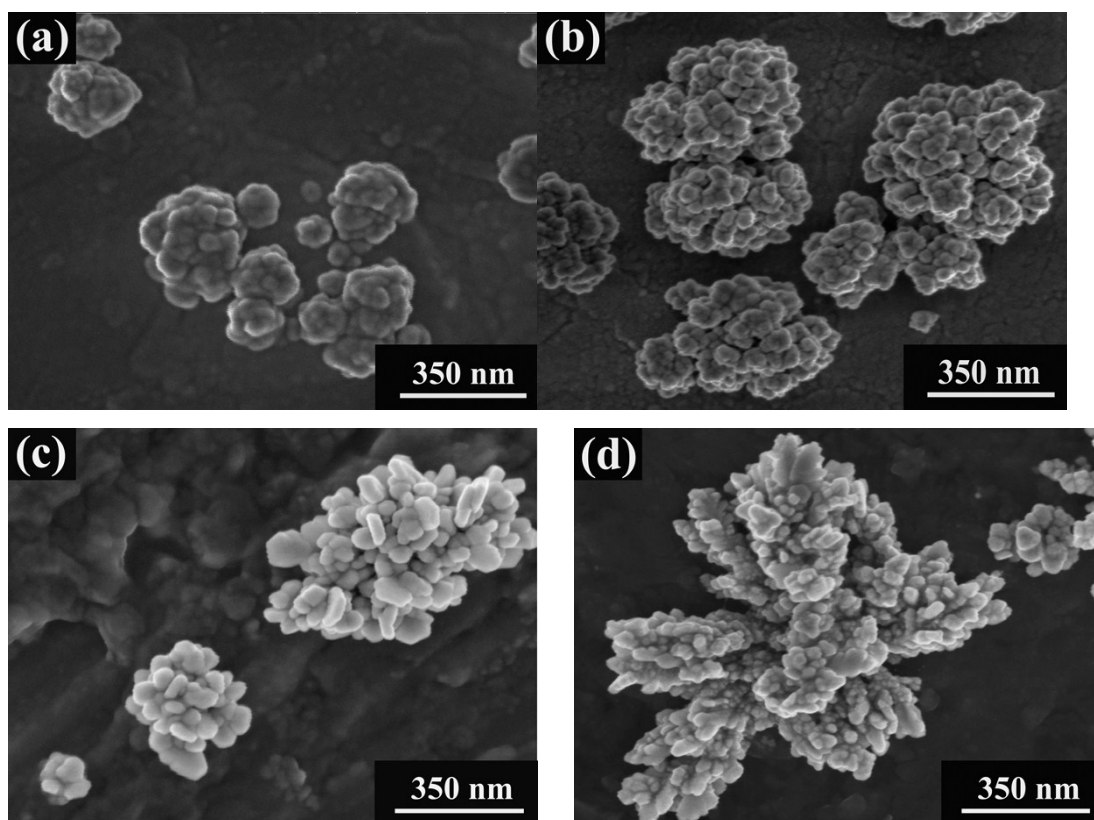

Figure 2. The SEM images of  $\text{Ag}_2\text{MoO}_4$  nanocrystal clusters under different aging times: (a)

3 h; (b) 6 h; (c) 12 h; (d) 24 h.
